# Supplementary material for: Cryptic developmental events determine medulloblastoma radiosensitivity and cellular heterogeneity without altering transcriptomic profile
Source: PubMed Central journal article supplement (PMC8139976; doi:10.1038/s42003-021-02099-w), 2021-05-21
Supplement: 42003_2021_2099_MOESM2_ESM.pdf [file 42003_2021_2099_MOESM2_ESM.pdf]

**Supplementary Figures for:**

**Cryptic developmental events determine medulloblastoma radiosensitivity and cellular heterogeneity without altering transcriptomic profile.**

Daniel Shiloh Malawsky\*\*<sup>1</sup>, Seth J. Weir\*\*<sup>1</sup>, Jennifer Ocasio<sup>1,2</sup>, Benjamin Babcock<sup>1</sup>, Taylor Dismuke<sup>1</sup>, Abigail H. Cleveland<sup>1,3</sup>, Andrew M. Donson<sup>4,5</sup>, Rajeev Vibhakar<sup>4,5</sup>, Kirk Wilhelmsen<sup>1,6,7</sup>, Timothy R. Gershon\*<sup>1,2,8</sup>

\* corresponding author

\*\* contributed equally to the work



**Supplementary Fig. 1 Proliferation is similar in OLIG2+ subsets of *G-Smo* and *M-Smo* tumors.** (A) IHC for pRB and OLIG2 in a representative *G-Smo* tumor, including a perivascular region where OLIG2+ cells are more frequent. Scale bar = 100  $\mu$ m. (B) Quantification of the fractions of pRB+ cells and OLIG2+ cells in *G-Smo* and *M-Smo* tumors, and the fraction of OLIG2+ cells that are pRB+. *G-Smo* tumors show significantly more pRB+ cells and OLIG2+ cells, but the pRB+ fraction of OLIG2+ cells is similar in both genotypes. Points represent values for individual replicates, bars indicate the means and whiskers indicate the SEM.



**Supplementary Fig. 2 Harmony co-clusters medulloblastoma cells with P7 WT CGNPs and stromal cells from tumors and WT cerebella.** (A) UMAP plot of HARMONY analysis of *G-Smo*, *M-Smo* and P7 WT cerebella, color-coded by cluster. (B) Feature plot of CGNP marker *Barhl1* and UBC marker *Eomes*, identifying the *Atoh1* lineage. (C) Feature plot of cerebellar interneuron markers *Pax3* and *Pax2* identifying the interneurons of ventricular zone lineage. (D) UMAPs as in (A), with genotype color-coded. The UMAP is reiterated with each genotype plotted on top in a separate iteration, to prevent over-plotting from obscuring each genotype.
