# Supplementary material for: Cryptic developmental events determine medulloblastoma radiosensitivity and cellular heterogeneity without altering transcriptomic profile
Source: PubMed Central journal article supplement (PMC8139976; doi:10.1038/s42003-021-02099-w), 2021-05-21
Supplement: 42003_2021_2099_MOESM3_ESM.pdf [file 42003_2021_2099_MOESM3_ESM.pdf]

## Description of Additional Supplementary Files

**File name:** Supplemental Data 1

**Description:** Microarray comparison of *G-Smo* vs *M-Smo* tumors.

**File name:** Supplemental Data 2

**Description:** Microarray comparison of *G-Smo* vs *M-Smo* tumors in Schuller et al. 2008.

**File name:** Supplemental Data 3

**Description:** Microarray comparison of *G-Smo* vs *M-Smo* tumors, untreated vs 2 hours after radiation.

**File name:** Supplemental Data 4

**Description:** Cluster markers in *G-Smo* vs *M-Smo* scRNA-seq data.

**File name:** Supplemental Data 5

**Description:** Genes differential in *G-Smo* clusters 1,2,7 vs *M-Smo* in scRNA-seq data.

**File name:** Supplemental Data 6

**Description:** Cluster markers in *G-Smo*, *M-Smo* & WT scRNA-seq data.

**File name:** Supplemental Data 7

**Description:** Endothelial cluster markers in *G-Smo*, *M-Smo* & WT scRNA-seq data.

**File name:** Supplemental Data 8

**Description:** Myeloid cluster markers in *G-Smo*, *M-Smo* & WT scRNA-seq data.

**File name:** Supplemental Data 9

**Description:** Fibroblast cluster markers in *G-Smo*, *M-Smo* & WT scRNA-seq data.
